# Supplementary material
Source: PubMed Central journal article supplement (PMC4114987)

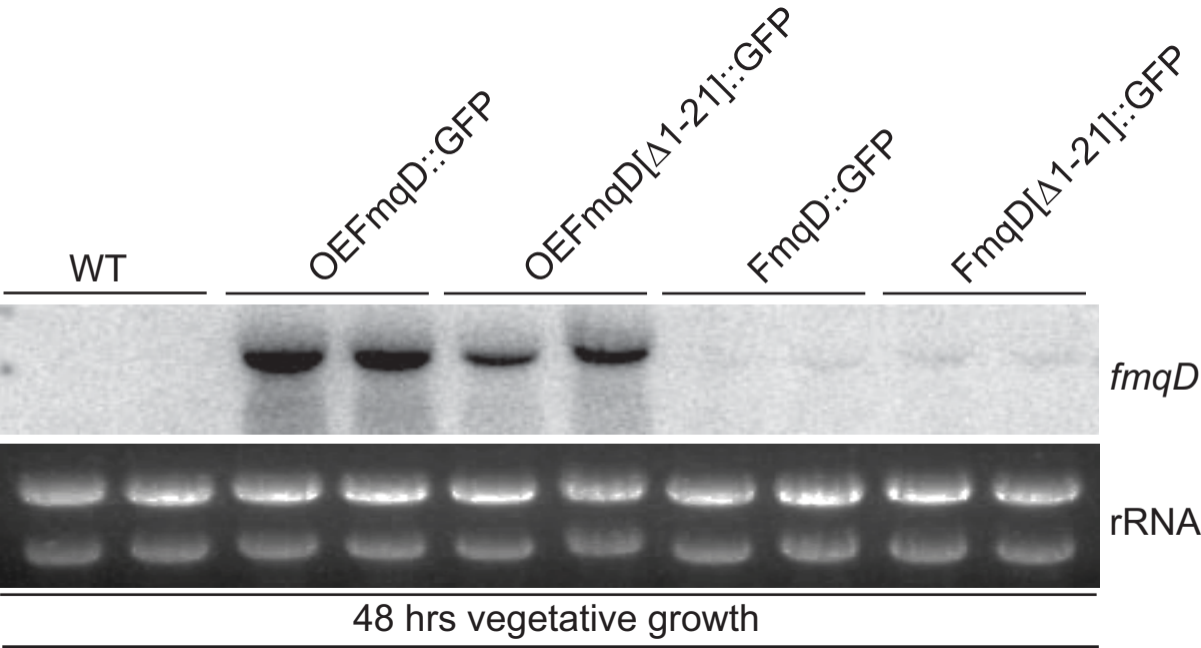

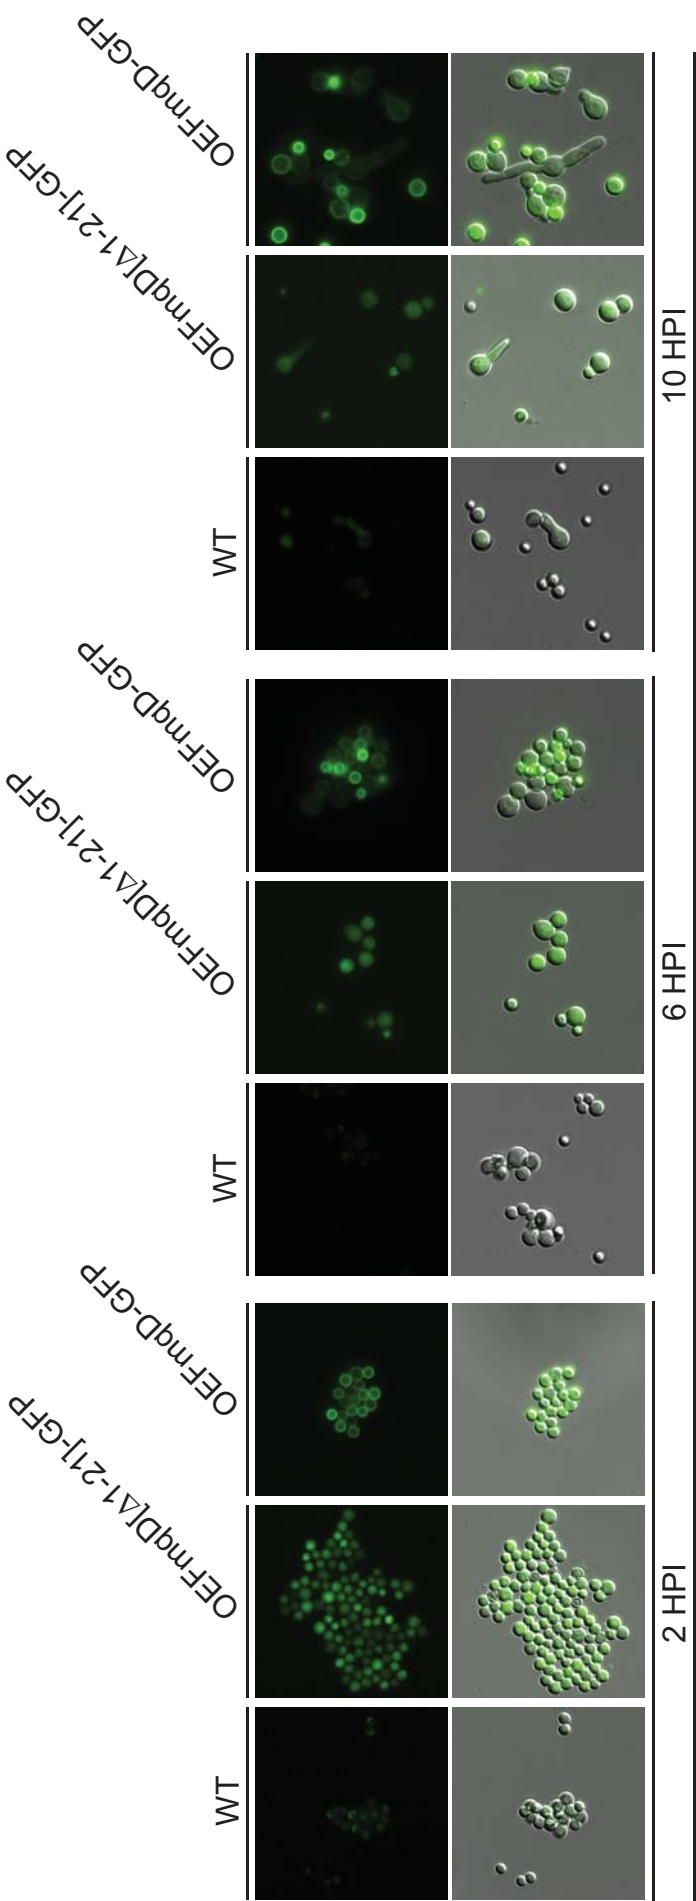

OEFmqA::GFP

FM4-64

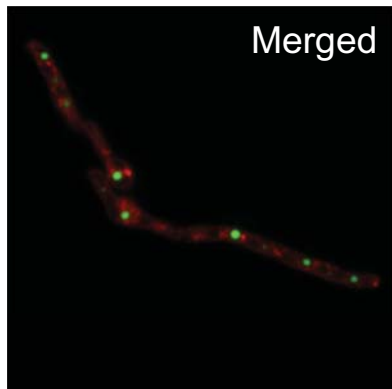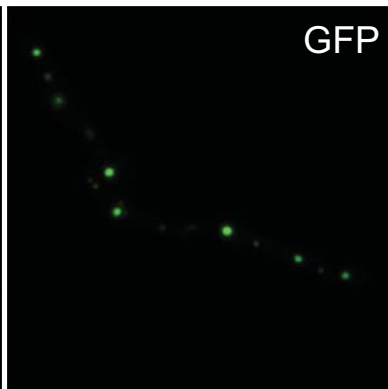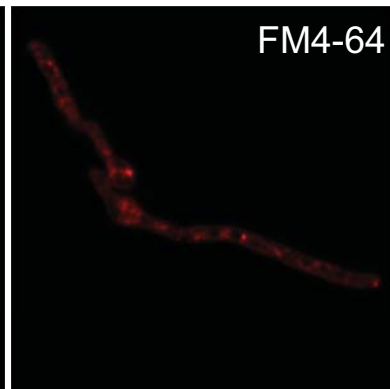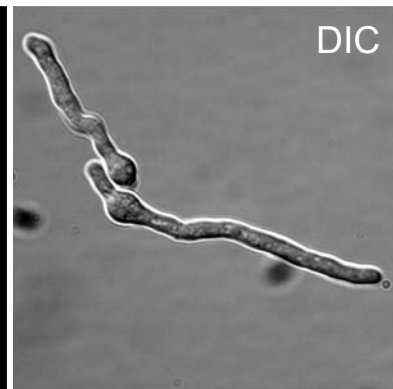

HOECHST

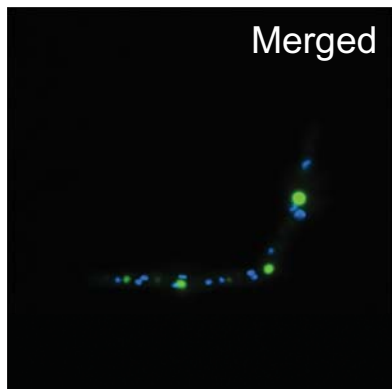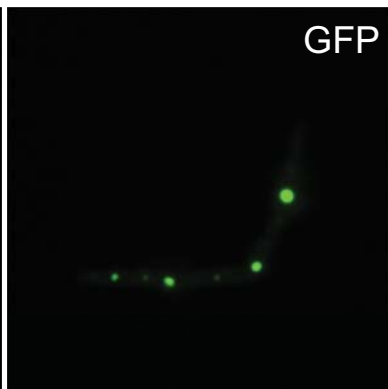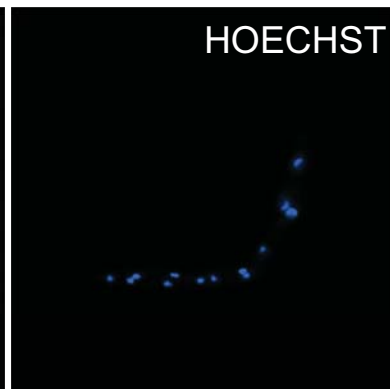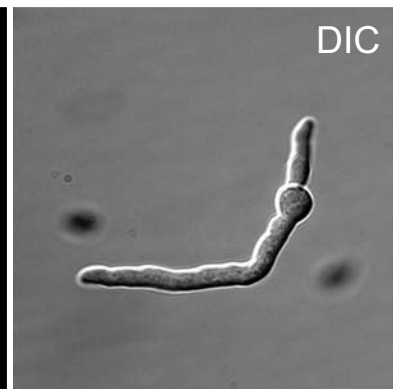

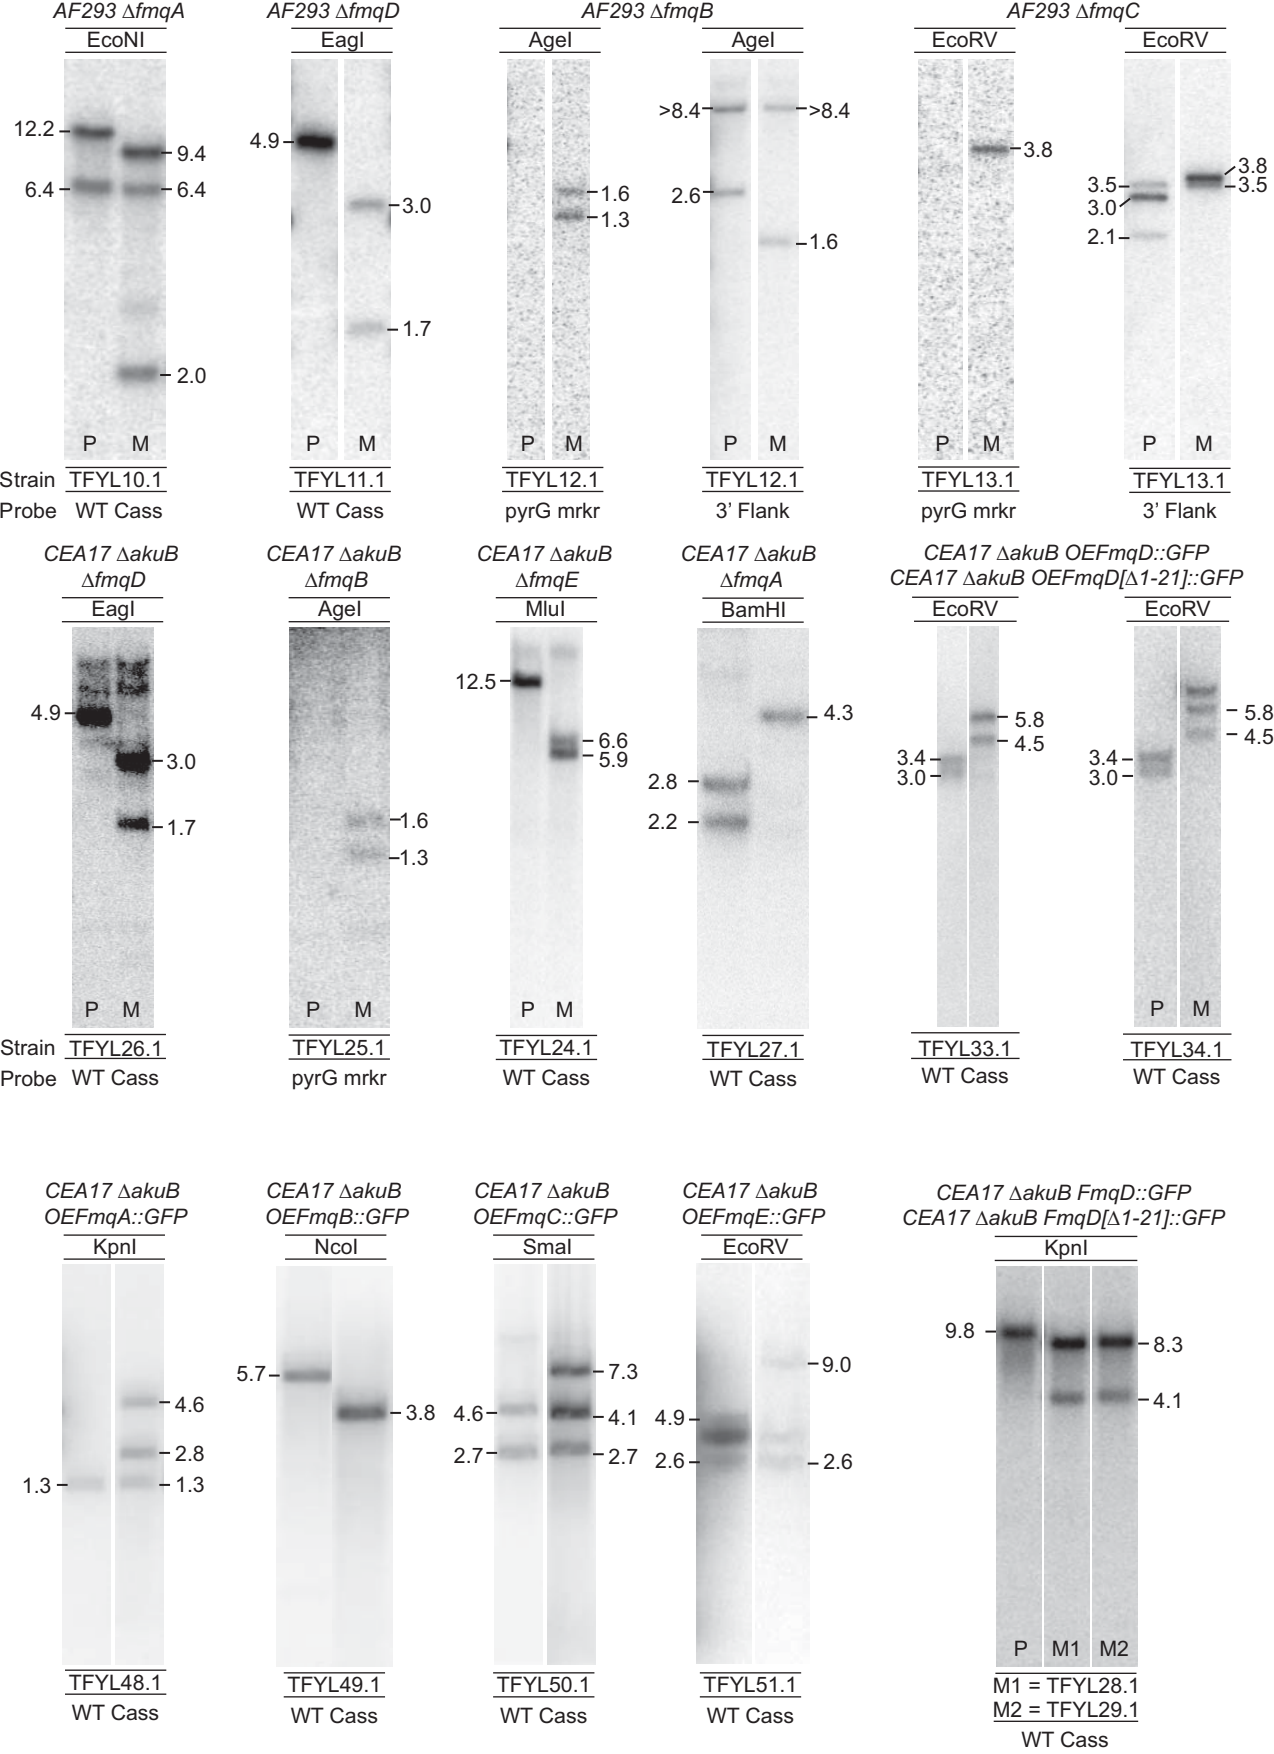

Supplement: NIHMS572373-supplement-Supp_FigS1-S4.pdf [file NIHMS572373-supplement-Supp_FigS1-S4.pdf]
